# Supplementary material for: Indoor bacterial, fungal and viral species and functional genes in urban and rural schools in Shanxi Province, China–association with asthma, rhinitis and rhinoconjunctivitis in high school students
Source: PubMed Central journal article supplement (PMC8199840; doi:10.1186/s40168-021-01091-0), 2021-06-12

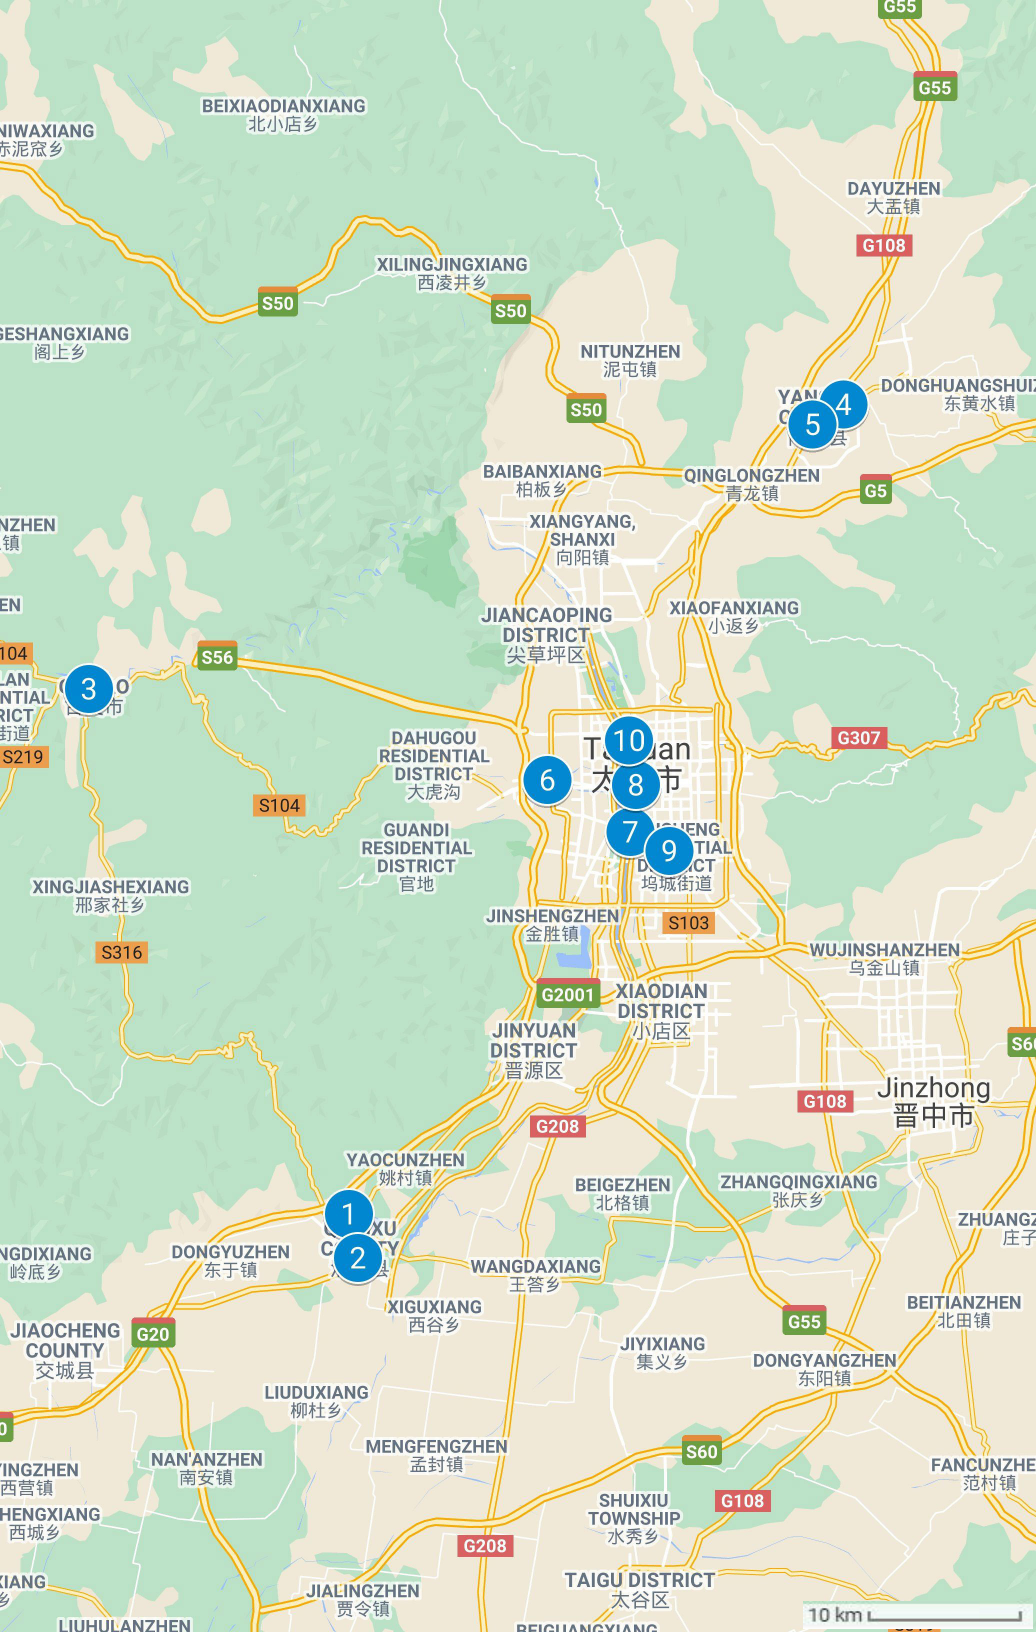

Supplement: 40168_2021_1091_MOESM2_ESM.pdf [file 40168_2021_1091_MOESM2_ESM.pdf]
